# Supplementary material for: Nutrient Composition Comparison between the Low Saturated Fat Swank Diet for Multiple Sclerosis and Healthy U.S.-Style Eating Pattern
Source: MDPI journal article supplement (doi:10.3390/nu11030616), 2019-03-13
Supplement: s1 [file s1]

## Supplementary Materials:

**Table 1.** Food descriptions and amounts used to calculate the nutrient composition of the seven-day low saturated fat Swank <sup>1</sup> menus.

| Meal                     | Food Description                                            | Grams <sup>2</sup> | Household Units                   |
|--------------------------|-------------------------------------------------------------|--------------------|-----------------------------------|
| ----- Sunday/Day 1 ----- |                                                             |                    |                                   |
| <b>Breakfast</b>         | Swank Pancakes                                              |                    | 4 pancakes                        |
|                          | egg, whole                                                  | 33.333             |                                   |
|                          | sugar, white granulated                                     | 5.556              |                                   |
|                          | salt, regular                                               | 0.338              |                                   |
|                          | buttermilk, skim, nonfat or fat free                        | 54.444             |                                   |
|                          | baking soda                                                 | 0.511              |                                   |
|                          | water - tap                                                 | 3.292              |                                   |
|                          | flour, white all-purpose, enriched                          | 27.778             |                                   |
|                          | syrup, pancake syrup, maple-flavored, regular               | 78.750             | 4 TB <sup>3</sup>                 |
|                          | eggs, poached                                               | 50.000             | 1 unknown size                    |
|                          | juice not specified: orange, juice, unknown type            | 249.000            | 1 CP <sup>4</sup> , without ice   |
| <b>Morning Snack</b>     | milk, skim                                                  | 245.000            | 8 FO <sup>5</sup>                 |
|                          | crackers, Ry-Krisp Natural                                  | 28.350             | 1 Oz <sup>6</sup>                 |
| <b>Lunch</b>             | Swank Pasta Salad                                           |                    | 1 serving (1/6 recipe)            |
|                          | broccoli, cooked from fresh                                 | 28.600             |                                   |
|                          | cauliflower, cooked from fresh                              | 32.240             |                                   |
|                          | rotini, whole wheat, cooked in unsalted water               | 103.948            |                                   |
|                          | celery, raw                                                 | 16.833             |                                   |
|                          | peas, green peas, cooked from frozen                        | 21.067             |                                   |
|                          | tomato, raw                                                 | 30.000             |                                   |
|                          | pimento                                                     | 18.900             |                                   |
|                          | garlic, fresh                                               | 0.500              |                                   |
|                          | mayonnaise or mayo type dressing, real, regular, commercial | 36.667             |                                   |
|                          | vinegar, red wine                                           | 2.490              |                                   |
|                          | salt, regular                                               | 1.014              |                                   |
|                          | basil - fresh                                               | 0.074              |                                   |
|                          | pepper (ground), black                                      | 0.100              |                                   |
|                          | crackers, saltine or soda, whole wheat                      | 7.500              | 2.5 each - 2" <sup>7</sup> square |
|                          | milk, skim                                                  | 245.000            | 8 FO                              |
| <b>Afternoon Snack</b>   | fresh fruit: apple, fresh, with skin                        | 182.000            | 1 medium - 3" diameter            |
|                          | Swank Nuts                                                  | 13.748             | 1 serving                         |
|                          | peanuts, roasted, oil roasted, salted                       | 3.248              | 3.67 nuts                         |
|                          | almonds, roasted, oil roasted, salted                       | 4.725              | 3.67 nuts                         |
|                          | cashews, roasted, oil roasted, salted                       | 5.775              | 3.67 nuts                         |
| <b>Dinner</b>            | Teriyaki Chicken                                            |                    | 1 serving (1/5 recipe)            |
|                          | chicken, breast, skin removed before cooking                | 81.000             |                                   |
|                          | soy sauce, regular                                          | 19.581             |                                   |
|                          | Stir-Fried Vegetables                                       |                    | 1 serving (1/4 recipe)            |
|                          | broccoli, cooked from frozen                                | 19.975             |                                   |
|                          | cauliflower, cooked from frozen                             | 20.872             |                                   |
|                          | brussels sprouts, cooked from frozen                        | 21.546             |                                   |
|                          | oil, not specified                                          | 3.405              | 1/4 TB                            |
|                          | oil, soybean - unhydrogenated                               | 1.861              |                                   |
|                          | oil, canola (canbra or rapeseed)                            | 0.773              |                                   |

| Meal                     | Food Description                                                                 | Grams <sup>2</sup> | Household Units                                   |
|--------------------------|----------------------------------------------------------------------------------|--------------------|---------------------------------------------------|
|                          | oil, olive                                                                       | 0.139              |                                                   |
|                          | oil, corn                                                                        | 0.351              |                                                   |
|                          | oil, sunflower                                                                   | 0.105              |                                                   |
|                          | oil, cottonseed                                                                  | 0.140              |                                                   |
|                          | oil, peanut                                                                      | 0.035              |                                                   |
|                          | salt, regular                                                                    | 0.760              |                                                   |
|                          | garlic, fresh                                                                    | 0.750              |                                                   |
|                          | rice, brown, unknown cooking type, cooked in unsalted water                      | 101.000            | 1/2 CP, after cooking                             |
|                          | sorbet, fruit                                                                    | 106.000            | 1/2 CP                                            |
| ----- Monday/Day 2 ----- |                                                                                  |                    |                                                   |
| <b>Breakfast</b>         | Swank Banana Strawberry Drink                                                    |                    | 1 serving (1/2 recipe)                            |
|                          | milk, skim                                                                       | 122.500            |                                                   |
|                          | banana, fresh or ripe                                                            | 59.000             |                                                   |
|                          | strawberries, frozen, unsweetened                                                | 55.250             |                                                   |
|                          | wheat, germ, crude                                                               | 3.594              |                                                   |
|                          | vanilla extract                                                                  | 2.167              |                                                   |
|                          | wheat bread, whole wheat, regular, commercial                                    | 36.000             | 1 medium slice                                    |
|                          | peanut butter, natural, unknown if salted                                        | 10.667             | 2 TS <sup>8</sup>                                 |
| <b>Morning Snack</b>     | milk, skim                                                                       | 245.000            | 8 FO                                              |
| <b>Lunch</b>             | Turkey Sandwich                                                                  |                    | 1 sandwich                                        |
|                          | wheat bread, whole wheat, regular, commercial                                    | 72.000             | 2 medium slice                                    |
|                          | turkey, light meat - unknown part, skin removed before cooking                   | 85.000             | 85 G <sup>9</sup> , after cooking, edible portion |
|                          | mayonnaise or mayo type dressing, real, regular, commercial                      | 9.167              | 2 TS                                              |
|                          | fresh fruit: grapes, fresh                                                       | 151.000            | 1 CP                                              |
|                          | milk, skim                                                                       | 245.000            | 8 FO                                              |
|                          | Swank Chewy Oatmeal Cookies                                                      |                    | 2 cookies (2/72 recipe)                           |
|                          | egg, whole                                                                       | 2.778              |                                                   |
|                          | oil, not specified (see Sunday/Day 1 Dinner)                                     | 4.036              |                                                   |
|                          | sugar, white granulated                                                          | 5.556              |                                                   |
|                          | sugar, brown sugar                                                               | 6.111              |                                                   |
|                          | vanilla extract                                                                  | 0.120              |                                                   |
|                          | salt, regular                                                                    | 0.084              |                                                   |
|                          | baking soda                                                                      | 0.128              |                                                   |
|                          | water - tap                                                                      | 1.234              |                                                   |
|                          | flour, white all-purpose, enriched                                               | 6.944              |                                                   |
|                          | oatmeal - dry, regular or quick                                                  | 4.500              |                                                   |
|                          | raisins, uncooked                                                                | 2.014              |                                                   |
|                          | walnuts (half recipe amount)                                                     | 1.625              |                                                   |
| <b>PM Snack</b>          | Swank Nuts (see menu Sunday/Day 1 Afternoon Snack)                               | 13.748             | 1 serving                                         |
| <b>Dinner</b>            | Swank Easy Salmon Patties                                                        |                    | 2 patties (2/6 recipe)                            |
|                          | salmon, canned - drained, pink, with salt                                        | 46.682             |                                                   |
|                          | egg, whole                                                                       | 16.667             |                                                   |
|                          | crackers, butter, regular, regular                                               | 18.000             |                                                   |
|                          | scallions or spring onions, raw (tops and bulb)                                  | 5.000              |                                                   |
|                          | dressing for salads, mayonnaise or mayo type dressing, real, regular, commercial | 9.167              |                                                   |
|                          | tarragon (ground)                                                                | 0.267              |                                                   |
|                          | oil, unspecified (see Sunday/Day 1 Dinner)                                       | 5.458              |                                                   |
|                          | Tossed Salad                                                                     |                    | 2 CP                                              |
|                          | carrots, raw                                                                     | 24.400             |                                                   |

| Meal                      | Food Description                                               | Grams <sup>2</sup> | Household Units                  |
|---------------------------|----------------------------------------------------------------|--------------------|----------------------------------|
|                           | tomato, raw                                                    | 36.000             |                                  |
|                           | lettuce, iceberg                                               | 17.600             |                                  |
|                           | endive (curly), raw                                            | 17.600             |                                  |
|                           | spinach, raw                                                   | 17.600             |                                  |
|                           | lettuce, romaine or cos                                        | 17.600             |                                  |
|                           | lettuce, green leaf                                            | 17.600             |                                  |
|                           | Swank French Dressing                                          |                    | 2 TS (2/48 recipe)               |
|                           | mustard, regular, regular                                      | 0.108              |                                  |
|                           | sugar, white granulated                                        | 0.521              |                                  |
|                           | salt, regular                                                  | 0.127              |                                  |
|                           | oil, unspecified (see Sunday/Day 1 Dinner)                     | 4.539              |                                  |
|                           | vinegar, distilled                                             | 1.240              |                                  |
|                           | lemon juice, fresh                                             | 1.271              |                                  |
|                           | celery juice (substituted for onion juice)                     | 0.205              |                                  |
|                           | paprika                                                        | 0.094              |                                  |
|                           | catsup, regular                                                | 0.625              |                                  |
|                           | potato, baked, plain, skin eaten                               | 173.000            | 1 medium - 2 1/4" to 3" diameter |
|                           | fresh fruit: watermelon, fresh                                 | 152.000            | 1 CP, cubed                      |
| ----- Tuesday/Day 3 ----- |                                                                |                    |                                  |
| <b>Breakfast</b>          | Swank Granola                                                  |                    | 1/2 CP (1/36 recipe)             |
|                           | oatmeal - dry, regular or quick                                | 11.250             |                                  |
|                           | wheat, bran (unprocessed)                                      | 3.222              |                                  |
|                           | cashews, roasted, oil roasted, salted                          | 1.792              |                                  |
|                           | almonds, raw (dried - unblanched)                              | 1.806              |                                  |
|                           | sunflower seeds, raw (dried)                                   | 1.944              |                                  |
|                           | sesame seeds, kernels (hulled), toasted kernels, salted        | 1.778              |                                  |
|                           | wheat, germ, crude                                             | 6.389              |                                  |
|                           | milk, unprepared dry powder, nonfat, regular                   | 1.889              |                                  |
|                           | salt, regular                                                  | 0.507              |                                  |
|                           | oil, unspecified (see Sunday/Day 1 Dinner)                     | 6.052              |                                  |
|                           | water - tap                                                    | 6.583              |                                  |
|                           | honey                                                          | 14.125             |                                  |
|                           | vanilla extract                                                | 1.083              |                                  |
|                           | raisins, uncooked                                              | 3.021              |                                  |
|                           | cranberries, dried                                             | 2.833              |                                  |
|                           | juice: apple, juice or cider, unknown type, unknown type       | 248.000            | 1 CP, without ice                |
| <b>AM Snack</b>           | fresh fruit: strawberries, fresh                               | 152.000            | 1 CP, halves                     |
| <b>Lunch</b>              | Tuna Salad Sandwich (modified from default sandwich)           |                    | 1 sandwich                       |
|                           | wheat bread, whole wheat, regular, commercial                  | 72.000             | 2 medium slices                  |
|                           | lettuce, iceberg                                               | 10.000             |                                  |
|                           | tuna, canned, light, water pack, regular, drained - not rinsed | 66.519             |                                  |
|                           | celery, raw                                                    | 21.813             |                                  |
|                           | mayonnaise or mayo type dressing, real, regular, commercial    | 9.167              | 2 TS                             |
|                           | pickle relish, sweet                                           | 6.614              |                                  |
|                           | salt, regular                                                  | 0.328              |                                  |
|                           | fresh fruit: banana, fresh or ripe                             | 118.000            | 1 medium - 7" to 7 7/8" long     |
|                           | milk, skim                                                     | 245.000            | 8 FO                             |
| <b>PM Snack</b>           | Swank Nuts (see menu Sunday/Day 1 Afternoon Snack)             | 13.748             | 1 serving                        |
| <b>Dinner</b>             | Swank Easy Oven Chicken                                        |                    | 1 serving (1/3 recipe)           |
|                           | chicken, breast, skin removed before cooking                   | 80.000             |                                  |

| Meal                        | Food Description                                         | Grams <sup>2</sup> | Household Units              |
|-----------------------------|----------------------------------------------------------|--------------------|------------------------------|
|                             | basil, ground                                            | 0.500              |                              |
|                             | pepper (ground), black                                   | 0.383              |                              |
|                             | paprika                                                  | 0.024              |                              |
|                             | Worcestershire sauce, regular                            | 1.910              |                              |
|                             | rice - uncooked, brown                                   | 7.708              |                              |
|                             | potato, baked, plain, skin eaten                         | 99.667             |                              |
|                             | tomato, cooked from fresh                                | 37.000             |                              |
|                             | peppers, green pepper - sweet, cooked                    | 6.400              |                              |
|                             | mushrooms, canned - drained, regular                     | 37.799             |                              |
|                             | Tossed Salad (see Monday/Day 2 Dinner)                   | 151.600            | 2 CP                         |
|                             | Swank Omar's Special Dressing                            |                    | 2 TS (2/120 recipe)          |
|                             | garlic, fresh                                            | 0.050              |                              |
|                             | egg - raw, whole                                         | 0.833              |                              |
|                             | sugar, white granulated                                  | 0.069              |                              |
|                             | salt, regular                                            | 0.051              |                              |
|                             | paprika                                                  | 0.009              |                              |
|                             | mustard, powder                                          | 0.006              |                              |
|                             | Worcestershire sauce, regular                            | 0.048              |                              |
|                             | catsup, regular                                          | 1.000              |                              |
|                             | vinegar, distilled                                       | 0.992              |                              |
|                             | oil, unspecified (see Sunday/Day 1 Dinner)               | 3.631              |                              |
|                             | water - tap                                              | 1.317              |                              |
|                             | Swank Angel Food Cake                                    |                    | 1 serving (1/8 recipe)       |
|                             | eggs, white only, cooked                                 | 30.563             |                              |
|                             | salt, regular                                            | 0.380              |                              |
|                             | cream of tartar                                          | 0.375              |                              |
|                             | sugar, white granulated                                  | 37.500             |                              |
|                             | flour, cake or pastry                                    | 21.406             |                              |
|                             | vanilla extract                                          | 0.271              |                              |
|                             | almond extract                                           | 0.313              |                              |
|                             | lemon extract                                            | 0.156              |                              |
| ----- Wednesday/Day 4 ----- |                                                          |                    |                              |
| <b>Breakfast</b>            | wheat bread, whole wheat, regular, commercial            | 36.000             | 1 medium slice               |
|                             | peanut butter, natural, unknown if salted                | 10.667             | 2 TS                         |
|                             | cereal, ready-to-eat, unknown type (Cheerios)            | 28.000             | 1 CP                         |
|                             | milk, skim                                               | 122.500            | 1/2 CP                       |
|                             | juice: orange, juice, unknown type                       | 249.000            | 1 CP, without ice            |
| <b>Morning Snack</b>        | milk, skim                                               | 245.000            | 8 FO                         |
|                             | chocolate sauce, syrup (thin), nonfat                    | 17.500             | 1 TB                         |
| <b>Lunch</b>                | Peanut Butter and Jelly Sandwich                         |                    | 1 sandwich                   |
|                             | wheat bread, whole wheat, regular, commercial            | 72.000             | 2 medium slices              |
|                             | peanut butter, natural, unknown if salted                | 21.333             | 4 TS                         |
|                             | jelly, regular                                           | 14.000             | 14 G                         |
|                             | fresh fruit: banana, fresh or ripe                       | 118.000            | 1 medium - 7" to 7 7/8" long |
|                             | milk, skim                                               | 245.000            | 8 FO                         |
| <b>Afternoon Snack</b>      | Swank Nuts (see Sunday/Day 1 Afternoon Snack)            | 13.748             | 1 serving                    |
| <b>Dinner</b>               | White Fish with Beer Batter                              |                    | 1 serving                    |
|                             | fish and seafood, whitefish, cooked from fresh or frozen | 154.000            |                              |
|                             | flour, white all-purpose, enriched                       | 6.845              |                              |
|                             | salt, regular                                            | 1.322              |                              |

| Meal                       | Food Description                                                                                        | Grams <sup>2</sup> | Household Units                      |
|----------------------------|---------------------------------------------------------------------------------------------------------|--------------------|--------------------------------------|
|                            | oil, unspecified (see Sunday/Day 1 Dinner)                                                              | 3.946              |                                      |
|                            | Swank Oven-Fried Potatoes                                                                               |                    | 1 serving (1/2 recipe)               |
|                            | potato, baked, plain, skin not eaten                                                                    | 131.000            | 1 medium                             |
|                            | oil, unspecified (see Sunday/Day 1 Dinner)                                                              | 6.809              | 1/2 TB                               |
|                            | salt, regular                                                                                           | 0.400              | 1 dash                               |
|                            | Tossed Salad (see Monday/Day 2 Dinner)                                                                  | 151.600            | 2 CP                                 |
|                            | lemon juice, unknown type                                                                               | 15.250             | 1 TB                                 |
|                            | fresh fruit: apple, fresh, with skin                                                                    | 182.000            | 1 medium - 3" diameter               |
| ----- Thursday/Day 5 ----- |                                                                                                         |                    |                                      |
| <b>Breakfast</b>           | eggs, poached                                                                                           | 50.000             | 1 unknown size                       |
|                            | wheat bread, whole wheat, regular, commercial                                                           | 36.000             | 1 medium slice                       |
|                            | jams or preserves, regular                                                                              | 20.000             | 1 TB                                 |
|                            | fresh fruit: orange, fresh                                                                              | 131.000            | 1 medium - 2 5/8" diameter           |
| <b>Morning Snack</b>       | milk, skim                                                                                              | 245.000            | 8 FO                                 |
| <b>Lunch</b>               | Swank Easy Vegetable Soup                                                                               |                    | 1 serving (1/9 recipe)               |
|                            | water - tap                                                                                             | 105.333            |                                      |
|                            | bouillon - unprepared (cube or granules), regular                                                       | 1.556              |                                      |
|                            | potato, boiled, with skin                                                                               | 49.400             |                                      |
|                            | carrots, cooked from fresh                                                                              | 24.960             |                                      |
|                            | celery, cooked                                                                                          | 24.333             |                                      |
|                            | peppers, green pepper - sweet, cooked                                                                   | 3.167              |                                      |
|                            | onion, white, yellow or red, cooked                                                                     | 22.750             |                                      |
|                            | corn, yellow, canned, regular - drained                                                                 | 25.200             |                                      |
|                            | tomato, canned, regular, plain                                                                          | 25.200             |                                      |
|                            | tomato, cooked from fresh                                                                               | 15.733             |                                      |
|                            | rolls, whole wheat                                                                                      | 28.000             | 1 small - 2" square, pan/dinner roll |
|                            | fresh fruit: apple, fresh, with skin                                                                    | 182.000            | 1 medium - 3" diameter               |
|                            | Swank Chocolate Brownies                                                                                |                    | 1 serving (1/16 recipe)              |
|                            | egg, whole                                                                                              | 6.250              |                                      |
|                            | sugar, white granulated                                                                                 | 9.375              |                                      |
|                            | vanilla extract                                                                                         | 0.135              |                                      |
|                            | chocolate sauce, syrup (thin), nonfat                                                                   | 8.750              |                                      |
|                            | oil, unspecified (see Day 1 Dinner)                                                                     | 4.539              |                                      |
|                            | flour, white all-purpose, enriched                                                                      | 5.859              |                                      |
|                            | salt, regular                                                                                           | 0.190              |                                      |
|                            | Walnuts (half recipe amount)                                                                            | 3.656              |                                      |
| <b>Afternoon Snack</b>     | Swank Nut (see Sunday/Day 1 Afternoon Snack)                                                            | 13.748             | 1 serving                            |
| <b>Dinner</b>              | Teriyaki Shrimp                                                                                         |                    | 1 serving (1/3.5 recipe)             |
|                            | shrimp, cooked from fresh                                                                               | 78.523             |                                      |
|                            | sauce, teriyaki sauce, commercial                                                                       | 21.438             |                                      |
|                            | vegetables, mixed and/or combination vegetables, Oriental (broccoli/mushroom/water chestnut/red pepper) | 127.000            | 1 CP                                 |
|                            | rice, brown, unknown cooking type, cooked in unsalted water                                             | 101.000            | 1/2 CP, after cooking                |
|                            | Swank Fresh Apple Cake                                                                                  |                    | 1 serving (1/12 recipe)              |
|                            | sugar, white granulated                                                                                 | 16.667             |                                      |
|                            | apple, baked or scalloped, with skin, unsweetened                                                       | 14.999             |                                      |
|                            | flour, cake or pastry                                                                                   | 17.125             |                                      |
|                            | baking soda                                                                                             | 0.383              |                                      |
|                            | salt, regular                                                                                           | 0.253              |                                      |
|                            | cinnamon (ground)                                                                                       | 0.217              |                                      |

| Meal                     | Food Description                                         | Grams <sup>2</sup> | Household Units                      |
|--------------------------|----------------------------------------------------------|--------------------|--------------------------------------|
|                          | nutmeg                                                   | 0.097              |                                      |
|                          | allspice (ground)                                        | 0.083              |                                      |
|                          | oil, unspecified (see Sunday/Day 1 Dinner)               | 4.539              |                                      |
|                          | egg, whole                                               | 4.167              |                                      |
|                          | margarine, spread, 60% fat, salted, unknown type of oil  | 0.298              |                                      |
|                          | raisins, uncooked                                        | 6.042              |                                      |
|                          | walnuts (half recipe amount)                             | 2.438              |                                      |
| ----- Friday/Day 6 ----- |                                                          |                    |                                      |
| <b>Breakfast</b>         | bagel, whole wheat, plain or with seasoning              | 105.000            | 1 medium - 3 1/2" - 4" diameter      |
|                          | Swank Yogurt Cream Cheese                                |                    | 2 servings (2/44 recipe)             |
|                          | yogurt, plain, nonfat (<1% fat)                          | 89.091             |                                      |
|                          | water, lost in evaporation process                       | -57.955            |                                      |
|                          | Fresh Fruit: Mixed                                       | 163.455            | 1 serving                            |
|                          | cantaloupe, fresh                                        | 42.720             |                                      |
|                          | blueberries, fresh                                       | 29.600             |                                      |
|                          | pear, fresh                                              | 32.200             |                                      |
|                          | pineapple, fresh                                         | 33.000             |                                      |
|                          | mandarin orange, fresh                                   | 25.935             |                                      |
|                          | milk, skim                                               | 245.000            | 8 FO                                 |
| <b>Morning Snack</b>     | milk, skim                                               | 245.000            | 8 FO                                 |
| <b>Lunch</b>             | Tossed Salad (see Monday/Day 2 Dinner)                   | 151.600            | 2 CP                                 |
|                          | Swank French Dressing (see Monday/Day 2 Dinner)          |                    | 4 TS (4/48 recipe)                   |
|                          | rolls, whole wheat                                       | 28.000             | 1 small - 2" square, pan/dinner roll |
|                          | milk, skim                                               | 245.000            | 8 FO                                 |
|                          | Swank Drop Sugar Cookies                                 |                    | 2 cookies (2/24 recipe)              |
|                          | egg, whole                                               | 8.333              |                                      |
|                          | oil, unspecified (see Sunday/Day 1 Dinner)               | 12.106             |                                      |
|                          | vanilla extract                                          | 0.722              |                                      |
|                          | sugar, white granulated                                  | 12.500             |                                      |
|                          | flour, white all-purpose, enriched                       | 23.438             |                                      |
|                          | baking powder, regular                                   | 0.767              |                                      |
|                          | salt, regular                                            | 0.253              |                                      |
| <b>Afternoon Snack</b>   | fresh fruit: banana, fresh or ripe                       | 118.000            | 1 medium - 7" to 7 7/8" long         |
| <b>Dinner</b>            | spaghetti noodles, whole wheat, cooked in unsalted water | 70.000             | 1/2 CP                               |
|                          | Swank Meatless Spaghetti Sauce                           |                    | 1 serving (1/10 recipe)              |
|                          | onion, white, yellow or red, cooked                      | 13.650             |                                      |
|                          | garlic, fresh                                            | 0.900              |                                      |
|                          | oil, olive                                               | 2.700              |                                      |
|                          | salt, regular                                            | 0.608              |                                      |
|                          | pepper (ground), black                                   | 0.100              |                                      |
|                          | oregano, ground                                          | 0.180              |                                      |
|                          | basil, ground                                            | 0.150              |                                      |
|                          | cayenne pepper                                           | 0.022              |                                      |
|                          | peppers, green pepper - sweet, cooked                    | 5.700              |                                      |
|                          | paste, tomato                                            | 34.019             |                                      |
|                          | sauce, tomato, regular                                   | 79.379             |                                      |
|                          | wine, cabernet sauvignon                                 | 11.760             |                                      |
|                          | sugar, brown sugar                                       | 1.375              |                                      |
|                          | mushrooms, cooked from fresh                             | 10.800             |                                      |
|                          | olives, black                                            | 45.359             |                                      |

| Meal                       | Food Description                                                | Grams <sup>2</sup> | Household Units                      |
|----------------------------|-----------------------------------------------------------------|--------------------|--------------------------------------|
|                            | nutrients, primary energy sources, alcohol                      | -1.247             |                                      |
|                            | nutrients, primary energy sources, energy (kilocalories)        | 0.000              |                                      |
|                            | Tossed Salad (see menu Monday/Day 2 dinner)                     | 151.600            | 2 CP                                 |
|                            | Swank Russian Dressing <sup>10</sup>                            |                    | 2 TS (2/120 recipe)                  |
|                            | sauce, tomato, regular                                          | 3.780              |                                      |
|                            | vinegar, distilled                                              | 1.983              |                                      |
|                            | salt, regular                                                   | 0.203              |                                      |
|                            | paprika                                                         | 0.019              |                                      |
|                            | sauce, Worcestershire sauce, regular                            | 0.286              |                                      |
|                            | oil, unspecified (see Day 1 Dinner)                             | 3.631              |                                      |
|                            | mustard, powder                                                 | 0.013              |                                      |
|                            | garlic, powder                                                  | 0.027              |                                      |
|                            | onion, white, yellow or red, raw                                | 1.167              |                                      |
|                            | sugar, white granulated                                         | 0.069              |                                      |
|                            | French bread                                                    | 32.000             | 1 small slice - 2" x 2 1/2" x 1 3/4" |
|                            | Swank Fresh Raspberry Sherbet                                   |                    | 1 serving (1/16 recipe)              |
|                            | gelatin powder, plain                                           | 0.438              |                                      |
|                            | sugar, white granulated                                         | 9.375              |                                      |
|                            | water - tap                                                     | 29.625             |                                      |
|                            | raspberries, fresh, red                                         | 30.750             |                                      |
|                            | juice or flavored drink, lemon juice, fresh                     | 1.906              |                                      |
|                            | egg - raw, white only                                           | 4.175              |                                      |
|                            | salt, regular                                                   | 0.048              |                                      |
| ----- Saturday/Day 7 ----- |                                                                 |                    |                                      |
| <b>Breakfast</b>           | Swank Waffles (Whole Wheat)                                     |                    | 1 serving (1/6 recipe)               |
|                            | flour, whole wheat, use in recipes not containing yeast         | 40.000             |                                      |
|                            | baking powder, regular                                          | 3.067              |                                      |
|                            | salt, regular                                                   | 1.014              |                                      |
|                            | sugar, white granulated                                         | 2.083              |                                      |
|                            | milk, skim, nonfat or fat free                                  | 51.042             |                                      |
|                            | egg, whole                                                      | 8.333              |                                      |
|                            | eggs, white only, cooked                                        | 11.133             |                                      |
|                            | oil, unspecified (see Sunday/Day 1 Dinner)                      | 4.539              |                                      |
|                            | fresh fruit: peach, fresh                                       | 150.000            | 1 medium - 2 2/3" diameter           |
|                            | milk, skim                                                      | 245.000            | 8 FO                                 |
| <b>Morning Snack</b>       | Swank Pumpkin Bread                                             |                    | 1 serving (1/24 recipe)              |
|                            | flour, white all-purpose, enriched                              | 13.021             |                                      |
|                            | baking soda                                                     | 0.383              |                                      |
|                            | salt, regular                                                   | 0.127              |                                      |
|                            | cinnamon (ground)                                               | 0.054              |                                      |
|                            | cloves (ground)                                                 | 0.045              |                                      |
|                            | sugar, white granulated                                         | 16.667             |                                      |
|                            | pumpkin, canned                                                 | 18.900             |                                      |
|                            | oil, unspecified (see Day 1 Dinner)                             | 2.270              |                                      |
|                            | walnuts (half recipe amount)                                    | 1.219              |                                      |
|                            | dates                                                           | 3.063              |                                      |
|                            | milk, skim                                                      | 245.000            | 8 FO                                 |
| <b>Lunch</b>               | pita bread, whole wheat                                         | 57.000             | 1 medium - 6" diameter               |
|                            | salad, chicken ("mayo" dressing), plain                         | 75.333             | 1/3 CP                               |
|                            | chicken, light meat - unknown part, skin removed before cooking | 39.649             |                                      |

| Meal                   | Food Description                                                          | Grams <sup>2</sup> | Household Units                      |
|------------------------|---------------------------------------------------------------------------|--------------------|--------------------------------------|
|                        | celery, raw                                                               | 14.832             |                                      |
|                        | mayonnaise or mayo type dressing, real, nonfat                            | 18.797             |                                      |
|                        | relish, pickle relish, sweet                                              | 4.497              |                                      |
|                        | fresh fruit: apple, fresh, with skin                                      | 182.000            | 1 medium - 3" diameter               |
|                        | milk, skim                                                                | 245.000            | 8 FO                                 |
| <b>Afternoon Snack</b> | Swank Nuts (see menu day 1 afternoon snack)                               | 13.748             | 1 serving                            |
| <b>Dinner</b>          | Swank Tuna Pot Pie                                                        |                    | 1 serving (1/6 recipe)               |
|                        | oil, unspecified (see Day 1 Dinner)                                       | 9.079              |                                      |
|                        | flour, white all-purpose, enriched                                        | 6.944              |                                      |
|                        | salt, regular                                                             | 1.521              |                                      |
|                        | pepper (ground), black                                                    | 0.096              |                                      |
|                        | marjoram (dried)                                                          | 0.024              |                                      |
|                        | milk, skim, nonfat or fat free                                            | 68.056             |                                      |
|                        | tuna, canned, light, water pack, regular, drained - not rinsed            | 64.495             |                                      |
|                        | mixed and/or combination vegetables, peas and carrots, cooked from frozen | 46.400             |                                      |
|                        | onion, pearl, cooked                                                      | 24.513             |                                      |
|                        | sauce, Worcestershire sauce, regular                                      | 1.910              |                                      |
|                        | flour, white all-purpose, enriched                                        | 20.833             |                                      |
|                        | salt, regular                                                             | 0.760              |                                      |
|                        | oil, unspecified (see Sunday/Day 1 Dinner)                                | 9.079              |                                      |
|                        | milk, skim, nonfat or fat free                                            | 5.104              |                                      |
|                        | Tossed Salad (see menu Monday/Day 2 Dinner)                               | 151.600            | 2 CP                                 |
|                        | Swank Omar's Special Dressing (see Tuesday/Day 3 Dinner)                  |                    | 2 TS (2/120 recipe)                  |
|                        | rolls, whole wheat                                                        | 28.000             | 1 small - 2" square, pan/dinner roll |
|                        | Swank Apple Crisp                                                         |                    | 1 serving (1/6 recipe)               |
|                        | apple, baked or scalloped, with skin, unsweetened                         | 96.255             |                                      |
|                        | cinnamon (ground)                                                         | 0.325              |                                      |
|                        | nutmeg                                                                    | 0.292              |                                      |
|                        | sugar, white granulated                                                   | 11.111             |                                      |
|                        | oatmeal - dry, regular or quick                                           | 13.500             |                                      |
|                        | flour, white all-purpose, enriched                                        | 10.417             |                                      |
|                        | sugar, brown sugar                                                        | 36.667             |                                      |
|                        | oil, unspecified (see Sunday/Day 1 Dinner)                                | 6.809              |                                      |

<sup>1</sup> adapted from menus and recipes in: Swank RL, Dugan B.B. *The Multiple Sclerosis Diet Book. A Low-Fat Diet for the Treatment of M.S.* New York, New York, USA: Doubleday; 1987; <sup>2</sup> weights from the Minnesota Nutrition Data System for Research NDSR [computer program]. Version 2017. Minneapolis, MN, USA: Nutrition Coordinating Center; 2017. Values are unrounded and are not meant to imply this level of accuracy. Weights for cooked foods are the weight after cooking, edible portion. <sup>3</sup> TB = tablespoon; <sup>4</sup> CP = cup; <sup>5</sup> FO = fluid ounce; <sup>6</sup> OZ = ounce; <sup>7</sup> " = inches; <sup>8</sup> TS = teaspoon; <sup>9</sup> G = grams; <sup>10</sup> used 2 teaspoons dressing, however, menu listed serving size as 3 teaspoons



**Table S2.** Healthy Eating Index-2015 (HEI-2015) and Alternate Healthy Eating Index-2010 (AHEI-2010) components.

| Components                                  | HEI-2015 (100 maximum points)                                   | AHEI-2010 (110 maximum points)                                      |
|---------------------------------------------|-----------------------------------------------------------------|---------------------------------------------------------------------|
| Adequacy                                    |                                                                 |                                                                     |
| Vegetables                                  |                                                                 |                                                                     |
| - Vegetables, total                         | c-eq <sup>1</sup> /1000 kcal including potatoes and legumes (5) | servings <sup>2</sup> /day excluding potatoes and legumes (10)      |
| - Vegetables, greens and beans              | c-eq/1000 kcal (5)                                              | not included as separate component                                  |
| Fruits                                      |                                                                 |                                                                     |
| - Fruit, total (i.e., includes juice)       | c-eq/1000 kcal (5)                                              | not included                                                        |
| - Fruit, whole (i.e., excludes juice)       | c-eq/1000 kcal (5)                                              | servings <sup>3</sup> /day (10)                                     |
| Grains                                      |                                                                 |                                                                     |
| - Grains, whole                             | oz-eq <sup>4</sup> /1000 kcal (10)                              | grams whole grains/day <sup>5</sup> (10)                            |
| Dairy                                       | c-eq/1000 kcal (10)                                             | not included                                                        |
| Protein Foods                               |                                                                 |                                                                     |
| - Protein Foods, total                      | oz-eq/1000 kcal (5)                                             | not included                                                        |
| - Protein Foods, seafood and plants         | oz-eq/1000 kcal (5)                                             | not included                                                        |
| - Protein Foods, nuts and legumes           | not included as separate component                              | servings/day (10)                                                   |
| Fats                                        |                                                                 |                                                                     |
| - Fatty Acids                               | (PUFA <sup>6</sup> + MUFA <sup>7</sup> )/SFA <sup>8</sup> (10)  | PUFA, % energy (10), excluding EPA <sup>9</sup> + DHA <sup>10</sup> |
| - Long chain omega-3 (EPA + DHA)            | not included as separate component                              | mg/day (10)                                                         |
| Moderation <sup>11</sup>                    |                                                                 |                                                                     |
| - Grains, refined                           | oz-eq/1000 kcal (10)                                            | not included                                                        |
| - Protein Foods, red and processed meat     | not included as separate component                              | servings/day (10)                                                   |
| - Fats, saturated fat                       | % energy (10)                                                   | not included                                                        |
| - Fats, <i>trans</i> -fat                   | not included as separate component                              | % energy (10)                                                       |
| - Added sugars                              | % energy (10)                                                   | not included                                                        |
| - Sugar-sweetened beverages and fruit juice | not included as separate component                              | servings/day (10)                                                   |
| - Sodium                                    | g/1000 kcal (10)                                                | mg/day <sup>5, 12</sup> (10)                                        |
| - Alcohol                                   | not included <sup>13</sup>                                      | drinks/day <sup>5, 14</sup> (10)                                    |

<sup>1</sup> c-eq = cup-equivalent, 1 cup raw, cooked or juice, 2 cups raw leafy, ½ cup dried; <sup>2</sup> serving = ½ cup or 1 cup raw, leafy; <sup>3</sup> serving = 1 piece fruit or ½ cup berries; <sup>4</sup> oz-eq = ounce-equivalent, 1 slice bread, ½ cup cooked pasta (70 g) or rice (79 g); <sup>5</sup> criteria for minimum and maximum score varies with sex; <sup>6</sup> PUFA = polyunsaturated fatty acids; <sup>7</sup> MUFA = monounsaturated fatty acids; <sup>8</sup> SFA = saturated fatty acids; <sup>9</sup> EPA = Eicosapentaenoic acid; <sup>10</sup> DHA = Docosahexaenoic acid; <sup>11</sup> moderation components are reverse-scored, i.e., higher intake receives a lower score; <sup>12</sup> Minimum and maximum scores for males and females were to be assigned based on the dataset's lowest and highest decile of sodium intake for each sex but the menu modeling did not provide a sodium distribution; therefore, 10th and 90th percentiles from the 2007-2008 NHANES for 20+ year old males and females were used instead; <sup>13</sup> alcohol is not a separate component but energy from alcohol is included in total energy intake which is used to compute scores that are calculated per 1000 kcals or as % energy; <sup>14</sup> no alcohol intake receives 2.5 points.

**Table S3.** Nutrient composition <sup>1</sup> of dietary supplements prescribed for low saturated fat Swank diet.

| Nutrient                                            | Females     |                   | Males       |                 |
|-----------------------------------------------------|-------------|-------------------|-------------|-----------------|
|                                                     | 19-50 years | Females ≥51 years | 19-50 years | Males ≥51 years |
| Energy (kcal)                                       | 45          | 45                | 45          | 45              |
| Total Protein (g)                                   | 0           | 0                 | 0           | 0               |
| Total Fat (g)                                       | 5           | 5                 | 5           | 5               |
| Total Carbohydrate (g)                              | 0           | 0                 | 0           | 0               |
| Total Saturated Fatty Acids (SFA) (g)               | 1           | 1                 | 1           | 1               |
| Total Monounsaturated Fatty Acids (MUFA) (g)        | 0           | 0                 | 0           | 0               |
| Total Polyunsaturated Fatty Acids (PUFA) (g)        | 0           | 0                 | 0           | 0               |
| Omega-3 Fatty Acids in Supplements (mg)             | 1100        | 1100              | 1100        | 1100            |
| Cholesterol (mg)                                    | 20          | 20                | 20          | 20              |
| PUFA 20:5 (eicosapentaenoic acid [EPA]) (g)         | 0.4         | 0.4               | 0.4         | 0.4             |
| PUFA 22:6 (docosahexaenoic acid [DHA]) (g)          | 0.5         | 0.5               | 0.5         | 0.5             |
| Total Vitamin A Activity (International Units) (IU) | 3350        | 4350              | 4350        | 4350            |
| Vitamin D (calciferol) (mcg)                        | 35          | 35                | 27.5        | 27.5            |
| Vitamin E (International Units) (IU)                | 432.5       | 440               | 432.5       | 435.5           |
| Vitamin K (phyloquinone) (mcg)                      | 25          | 20                | 20          | 20              |
| Vitamin C (ascorbic acid) (mg)                      | 1060        | 1120              | 1060        | 1120            |
| Thiamin (vitamin B1) (mg)                           | 1.5         | 4.5               | 1.35        | 4.5             |
| Riboflavin (vitamin B2) (mg)                        | 1.7         | 3.4               | 1.7         | 3.4             |
| Niacin (vitamin B3) (mg)                            | 20          | 20                | 18          | 20              |
| Pantothenic Acid (mg)                               | 10          | 15                | 16          | 15              |
| Vitamin B-6 (mg)                                    | 2           | 6                 | 3           | 6               |
| Synthetic Folate (folic acid) (mcg)                 | 400         | 400               | 400         | 400             |
| Vitamin B-12 (cobalamin) (mcg)                      | 6           | 25                | 18          | 25              |
| Biotin (mcg)                                        | 300         | 30                | 75          | 30              |
| Lycopene (mcg)                                      | 0           | 0                 | 300         | 370             |
| Calcium (mg)                                        | 500         | 500               | 210         | 120             |
| Chromium (mcg)                                      | 120         | 180               | 120         | 180             |
| Copper (mg)                                         | 2           | 2.2               | 2           | 2.2             |
| Iodine (mcg)                                        | 150         | 150               | 0           | 150             |
| Iron (mg)                                           | 18          | 0                 | 0           | 0               |
| Magnesium (mg)                                      | 50          | 50                | 140         | 110             |
| Manganese (mg)                                      | 2           | 4.2               | 2           | 4.2             |
| Molybdenum (mcg)                                    | 0           | 90                | 0           | 90              |
| Phosphorus (mg)                                     | 0           | 0                 | 0           | 0               |
| Potassium (mg)                                      | 0           | 0                 | 0           | 0               |
| Selenium (mcg)                                      | 20          | 27                | 110         | 117             |
| Sodium (mg)                                         | 0           | 0                 | 0           | 0               |
| Zinc (mg)                                           | 15          | 24                | 15          | 24              |
| Total Dietary Fiber (g)                             | 0           | 0                 | 0           | 0               |
| Soluble Dietary Fiber (g)                           | 0           | 0                 | 0           | 0               |
| Insoluble Dietary Fiber (g)                         | 0           | 0                 | 0           | 0               |
| Betaine (mg)                                        | 0           | 0                 | 0           | 0               |
| Choline (mg)                                        | 0           | 0                 | 0           | 0               |
| Caffeine (mg)                                       | 0           | 0                 | 0           | 0               |
| Phytic Acid (mg)                                    | 0           | 0                 | 0           | 0               |
| Total Trans-Fatty Acids (TRANS) (g)                 | 0           | 0                 | 0           | 0               |
| PUFA 18:3 n-3 (alpha-linolenic acid [ALA]) (g)      | 0           | 0                 | 0           | 0               |

<sup>1</sup> Obtained from Nutrition Data System for Research (NDSR) software version 2017, developed by the Nutrition Coordinating Center (NCC), University of Minnesota, Minneapolis, Minnesota, USA (May 2017).

**Table S4.** Alternate Healthy Eating Index-2010 (AHEI-2010) component and total score for 1800 kcal (7531 kJ) female and 2200 kcal (9205 kJ) male Swank low saturated fat and Healthy US-Style Pattern (HEP) <sup>1</sup> diets.

| Component (maximum score)                        | 1800 kcal (7531 kJ) Female 31-50 years |                  | 2200 kcal (9205 kJ) Male 31-50 years |      |
|--------------------------------------------------|----------------------------------------|------------------|--------------------------------------|------|
|                                                  | Swank                                  | HEP <sup>1</sup> | Swank                                | HEP  |
|                                                  | ----- Score -----                      |                  |                                      |      |
| Vegetables (10)                                  | 4.4                                    | 6.9              | 5.3                                  | 8.1  |
| Fruit (10)                                       | 7.4                                    | 5.3              | 9.1                                  | 7.1  |
| Whole grains (10)                                | 8.9                                    | 6.4              | 9.0                                  | 6.2  |
| Sugar-sweetened beverages and fruit juice (10)   | 5.4                                    | 5.6              | 4.4                                  | 4.1  |
| Nuts and legumes (10)                            | 10.0                                   | 10.0             | 10.0                                 | 10.0 |
| Red/processed meat (10)                          | 10.0                                   | 4.9              | 10.0                                 | 3.8  |
| <i>Trans</i> -fat (10)                           | 10.0                                   | 10.0             | 10.0                                 | 10.0 |
| Long chain omega-3 fatty acids <sup>2</sup> (10) | 10.0                                   | 8.8              | 10.0                                 | 10.0 |
| PUFA <sup>3</sup> (10)                           | 10.0                                   | 9.7              | 10.0                                 | 9.8  |
| Sodium (10)                                      | 9.2                                    | 8.5              | 10.0                                 | 9.9  |
| Alcohol (10)                                     | 2.5                                    | 2.5              | 2.5                                  | 2.5  |
| Total Score (110)                                | 87.7                                   | 78.6             | 90.3                                 | 81.5 |

<sup>1</sup> Healthy US-Style Eating Pattern; <sup>2</sup> Eicosapentaenoic acid (EPA) and Docosahexaenoic acid (DHA); <sup>3</sup> Polyunsaturated Fatty Acids excluding EPA and DHA.
